# Supplementary material for: Highly diverse root endophyte bacterial community is driven by growth substrate and is plant genotype-independent in common bean (Phaseolus vulgaris L.)
Source: PeerJ journal article supplement (doi:10.7717/peerj.9423), 2020-06-26

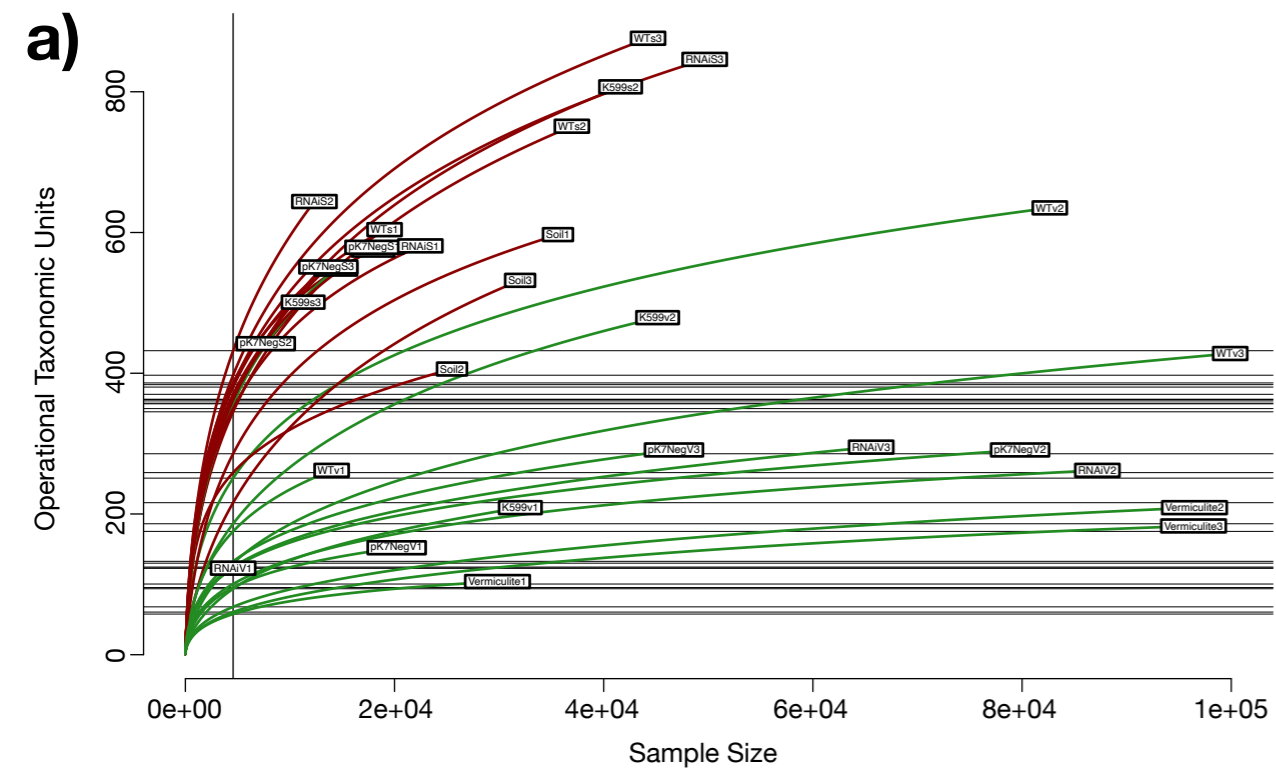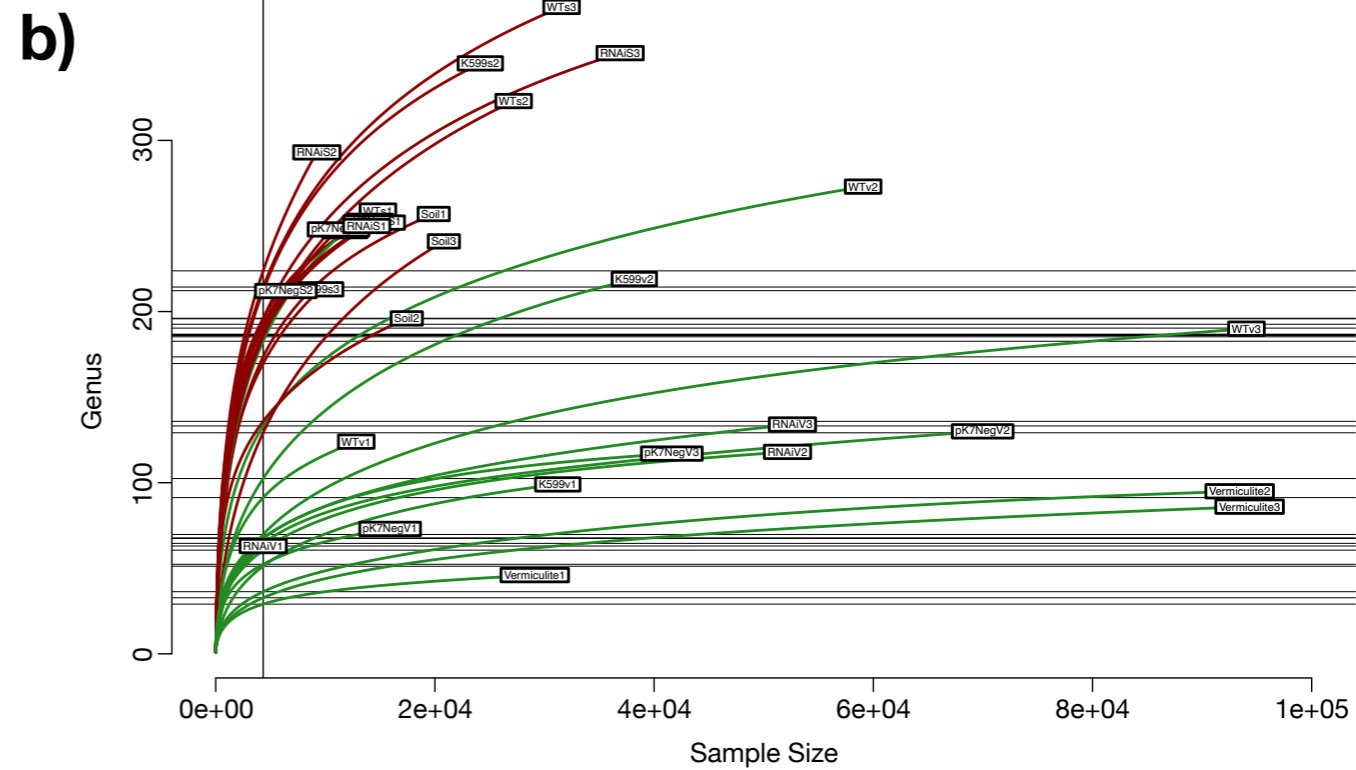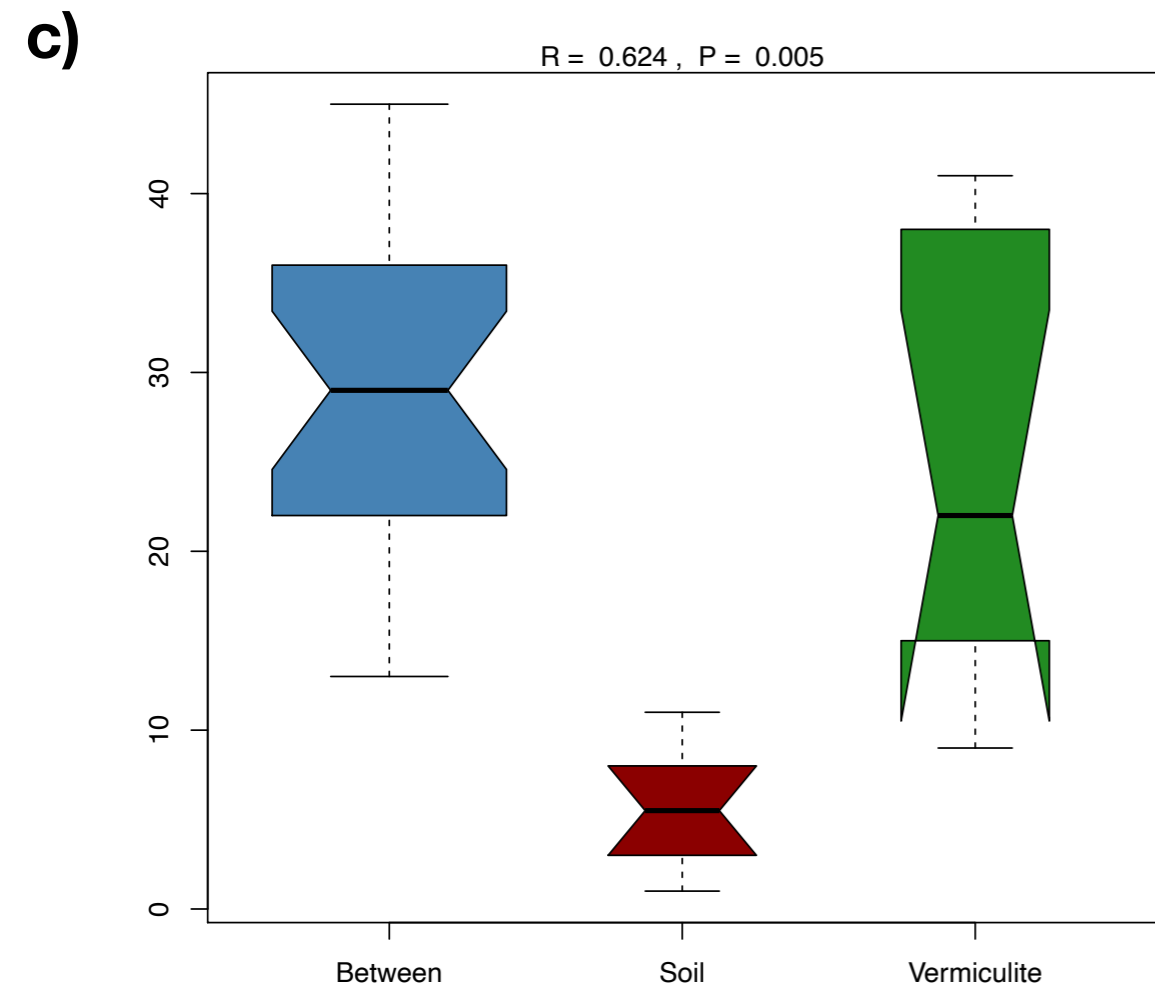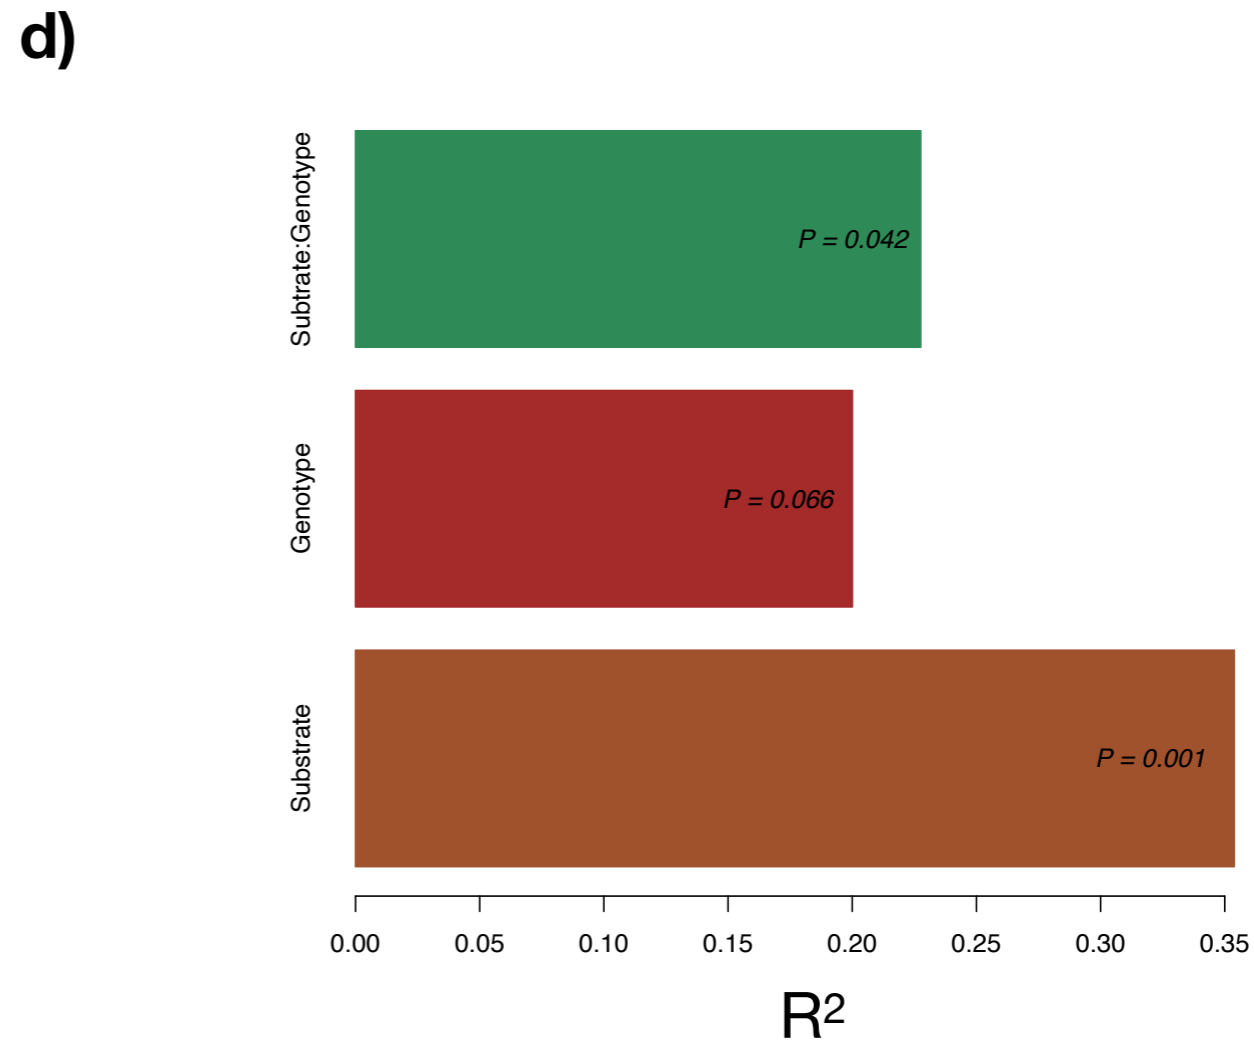

Supplement: Figure_S3_SF3.pdf [file Figure_S3_SF3.pdf]
