# Supplementary material for: Highly diverse root endophyte bacterial community is driven by growth substrate and is plant genotype-independent in common bean (Phaseolus vulgaris L.)
Source: PeerJ journal article supplement (doi:10.7717/peerj.9423), 2020-06-26

a)

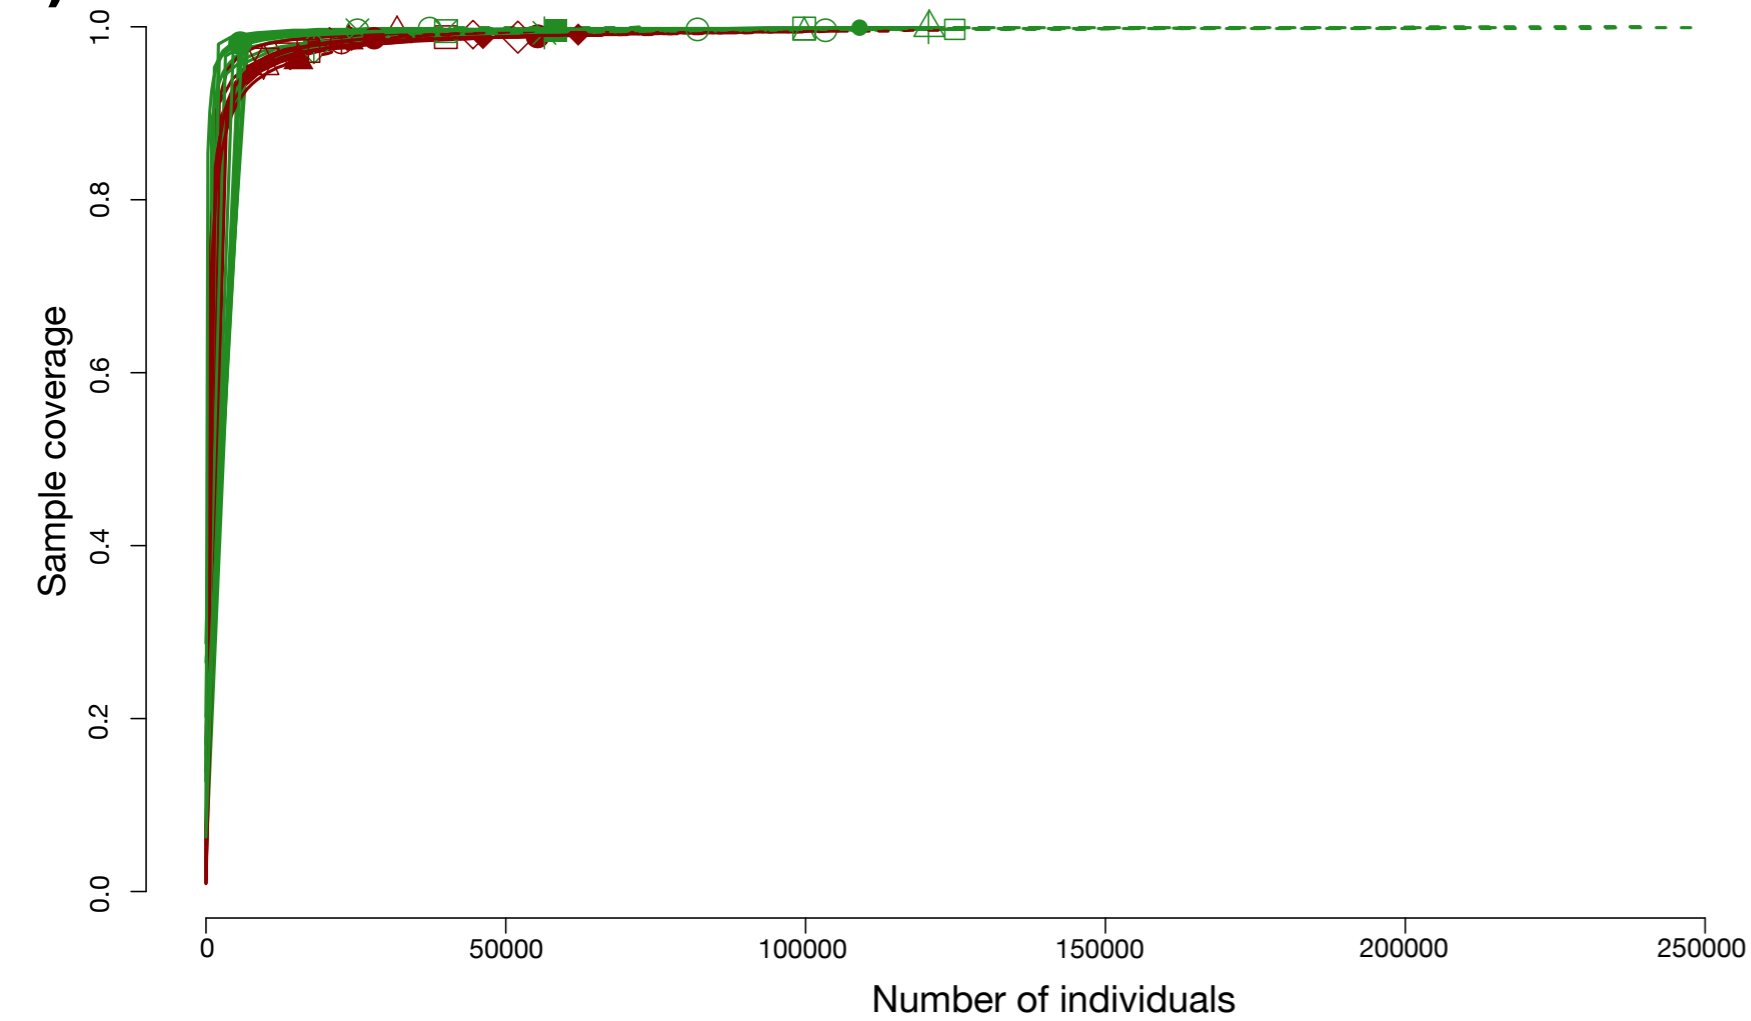

Soil-1  
Soil-2  
Soil-3  
Vermiculite-1  
Vermiculite-2  
Vermiculite-3

WT<sub>S</sub>-1  
WT<sub>S</sub>-2  
WT<sub>S</sub>-3  
WT<sub>V</sub>-1  
WT<sub>V</sub>-2  
WT<sub>V</sub>-3

K599<sub>S</sub>-1  
K599<sub>S</sub>-2  
K599<sub>S</sub>-3  
K599<sub>V</sub>-1  
K599<sub>V</sub>-2  
K599<sub>V</sub>-3

pK7Neg<sub>S</sub>-1  
pK7Neg<sub>S</sub>-2  
pK7Neg<sub>S</sub>-3  
pK7Neg<sub>V</sub>-1  
pK7Neg<sub>V</sub>-2  
pK7Neg<sub>V</sub>-3

RNAi<sub>S</sub>-1  
RNAi<sub>S</sub>-2  
RNAi<sub>S</sub>-3  
RNAi<sub>V</sub>-1  
RNAi<sub>V</sub>-2  
RNAi<sub>V</sub>-3

Method

———— Interpolated  
- - - - Extrapolated

b)

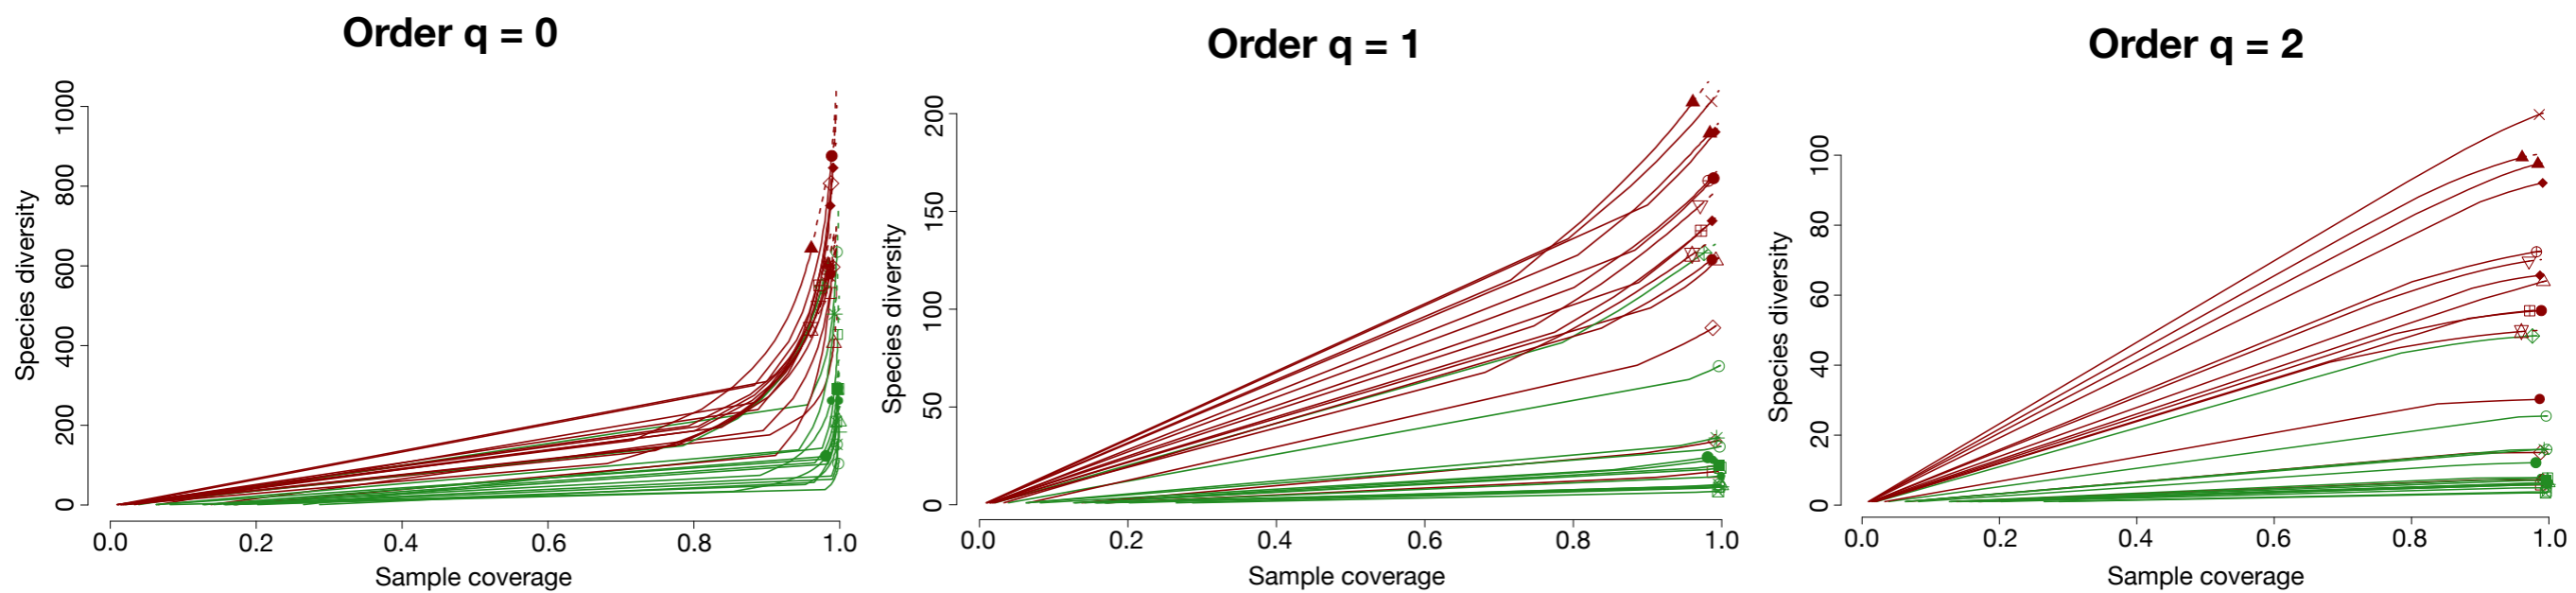

Supplement: Figure_S4_SF4.pdf [file Figure_S4_SF4.pdf]
