# Supplementary material for: Highly diverse root endophyte bacterial community is driven by growth substrate and is plant genotype-independent in common bean (Phaseolus vulgaris L.)
Source: PeerJ journal article supplement (doi:10.7717/peerj.9423), 2020-06-26
Supplement: Figure_S6_SF6.pdf [file Figure_S6_SF6.pdf]

**a)** Significant OTUs Enrichment/Depletion  
K599 vs WT

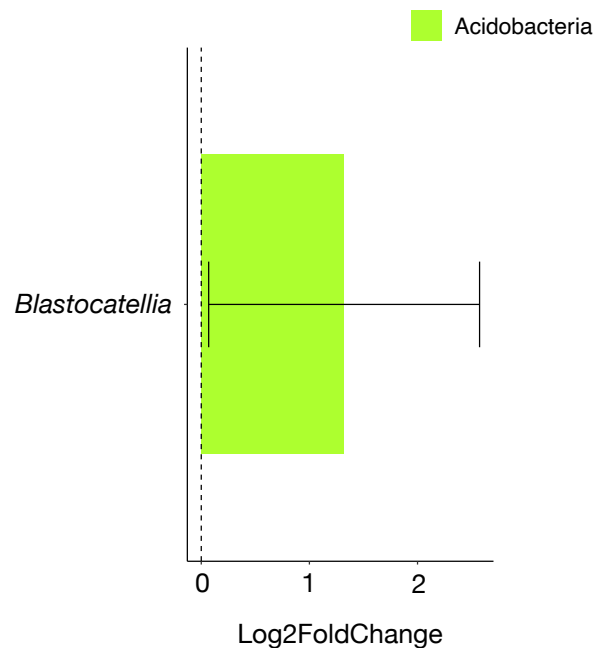

**b)** Significant OTUs Enrichment/Depletion  
pK7Neg vs WT

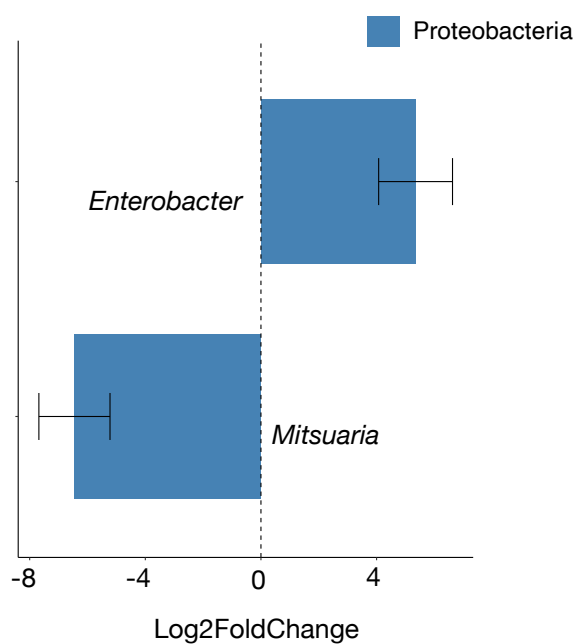

**c)** Significant OTUs Enrichment/Depletion  
RNAi vs WT

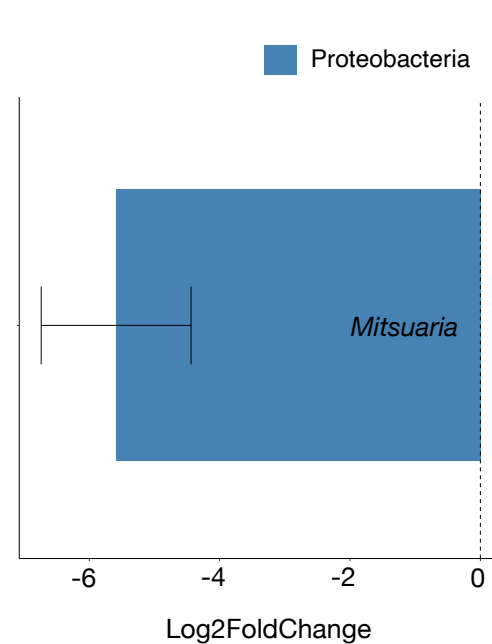

**d)** Significant OTUs Enrichment/Depletion  
RNAi vs WT

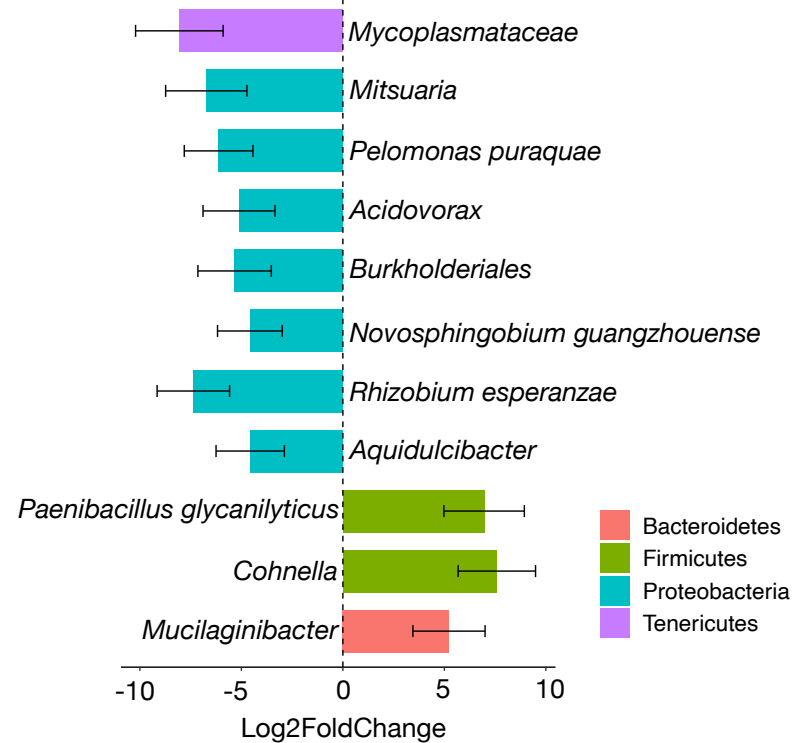

**Soil Substrate**

**Vermiculite Substrate**
